# Supplementary material for: Ascorbate Suppresses VEGF Expression in Retinal Pigment Epithelial Cells
Source: PubMed Central journal article supplement (PMC6049987; doi:10.1167/iovs.18-24101), 2018-07
Supplement: iovs-59-08-22_s03.pdf [file iovs-59-08-22_s03.pdf]

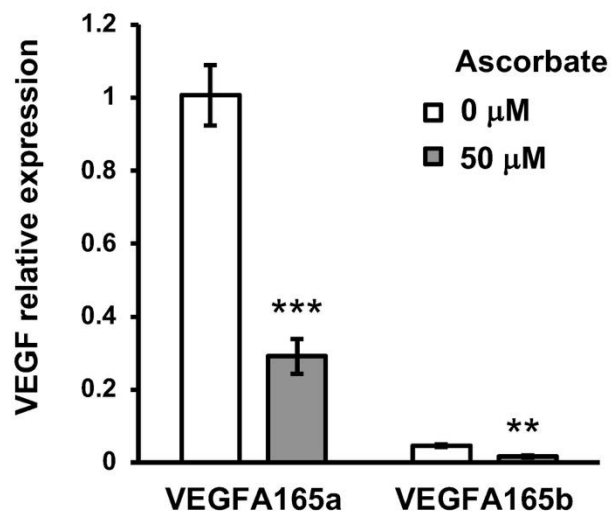

**Supplemental Figure 1. Both isoforms of *VEGFA* were reduced after ascorbate treatment.**

The transcript level of pro-angiogenic *VEGFA*-165a was much higher than that of anti-angiogenic *VEGFA*-165b, both of which were suppressed by ascorbate (50 μM) treatment. (\*\*  $P < 0.01$ , \*\*\*  $P < 0.001$ )
