# Supplementary material for: Ascorbate Suppresses VEGF Expression in Retinal Pigment Epithelial Cells
Source: PubMed Central journal article supplement (PMC6049987; doi:10.1167/iovs.18-24101), 2018-07
Supplement: iovs-59-08-22_s04.pdf [file iovs-59-08-22_s04.pdf]

**Supplemental Table 1. Primers used for quantitative RT-PCR.**

| <b>Gene</b>        | <b>Species</b> | <b>Forward (5'→3')</b>      | <b>Reverse (5'→3')</b>        |
|--------------------|----------------|-----------------------------|-------------------------------|
| <i>VEGFA</i>       | Human          | GCCTTGCCTTGCTGCTCTAC        | TGATTCTGCCCTCCTCCTTCTG        |
| <i>VEGFA 165-a</i> | Human          | GAGCAAGACAAGAAAATCCC        | CCTCGGCTTGTCACATCTG           |
| <i>VEGFA 165-b</i> | Human          | GAGCAAGACAAGAAAATCCC        | GTGAGAGATCTGCAAGTACG          |
| <i>ACTB</i>        | Human          | TCCCTGGAGAAGAGCTACG         | GTAGTTTCGTGGATGCCACA          |
| <i>Vegfa</i>       | Rat            | GAGCAACGTCACTATGCAGATCATGCG | CTTTGGTCTGCATTACATCTGCTATGCTG |
| <i>Actb</i>        | Rat            | GCCACCAGTTCGCCATGGATGACG    | CACACCCRGGRGCCRAGGGCGG        |
| <i>Vegfa</i>       | Mouse          | GCCAGCACATAGGAGAGATGAGCTTCC | CTTTGGTCTGCATTACATCTGCTGTGC   |
| <i>Actb</i>        | Mouse          | GTCGAGTCGCGTCCACC           | GTCATCCATGGCGAACTGGT          |
